# Supplementary material
Source: PubMed Central journal article supplement (PMC2891956)
Supplement: NIHMS95799-supplement-01.pdf [file NIHMS95799-supplement-01.pdf]

Type of file: table

Label: 1

Filename: table\_1.doc

Supplemental Table 1. Demographic Differences by AGTR1 genotype

|               | A/A<br>(N = 135) | C allele carrier<br>(N = 96) | df  | Test statistic | p value |
|---------------|------------------|------------------------------|-----|----------------|---------|
| Depressed     | 57.8% (78)       | 61.5% (59)                   | 1   | 0.32           | 0.5747  |
| Age           | 69.1 (6.3)       | 70.1 (6.6)                   | 229 | 1.07           | 0.2867  |
| Education     | 14.8 (2.1)       | 14.8 (2.3)                   | 229 | 0.13           | 0.8976  |
| Sex (Female)  | 65.2% (88)       | 69.8% (67)                   | 1   | 0.32           | 0.5711  |
| Hypertension  | 30.4% (41)       | 26.0% (25)                   | 1   | 0.52           | 0.4729  |
| Heart Disease | 13.3% (18)       | 11.5% (11)                   | 1   | -              | 0.8407  |
| Diabetes      | 3.0% (4)         | 5.2% (5)                     | 1   | -              | 0.4952  |
| Time Between  | 724.1 (58.9)     | 731.4 (47.3)                 | 217 | 1.03           | 0.3065  |
| MRI scans     |                  |                              |     |                |         |
| MMSE          | 28.8 (1.5)       | 28.6 (1.9)                   | 179 | 1.10           | 0.2709  |
|               | (N=78)           | (N=59)                       |     |                |         |
| MADRS         | 26.2 (7.7)       | 26.8 (7.4)                   | 135 | 0.47           | 0.6380  |
| Age of Onset  | 42.5 (20.3)      | 44.6 (21.1)                  | 135 | 0.60           | 0.5486  |

Continuous measures presented as mean (SD); categorical presented as % (N). Age and education presented in years, time between MRIs in days. MMSE and MADRS scores were scores at enrollment. Categorical variables analyzed using chi-square tests, except for DM and heart disease which used the Fisher's Exact Test. Continuous measures analyzed using pooled two-tail t-tests, except for MMSE and time between MRIs where the Satterthwaite t-test was used due to unequal variance.

Type of file: table

Label: 2

Filename: table\_2.doc

Supplemental Table 2. Demographic diagnoses by *AGTR2* genotype for men

|               | C allele<br>(N = 33) | A allele<br>(N = 43) | <i>df</i> | Test statistic | p value |
|---------------|----------------------|----------------------|-----------|----------------|---------|
| Depressed     | 63.6% (21)           | 76.7% (33)           | 1         | 1.56           | 0.2117  |
| Age           | 69.7 (7.4)           | 67.9 (5.8)           | 74        | 1.19           | 0.2361  |
| Education     | 15.3 (2.5)           | 14.8 (2.4)           | 74        | 0.92           | 0.3626  |
| Hypertension  | 27.3% (9)            | 34.9% (15)           | 1         | 0.50           | 0.4793  |
| Heart Disease | 18.2% (6)            | 14.0% (6)            | 1         | -              | 0.7535  |
| Diabetes      | 6.1% (2)             | 2.3% (1)             | 1         | -              | 0.5761  |
| Time Between  | 707.1 (59.9)         | 728.9 (54.9)         | 74        | 1.63           | 0.1072  |
| MRI Scans     |                      |                      |           |                |         |
| MMSE          | 28.5 (2.7)           | 28.6 (1.3)           | 43.4      | 0.30           | 0.7685  |
|               | N = 21               | N = 33               |           |                |         |
| MADRS         | 27.4 (7.7)           | 24.4 (7.3)           | 52        | 1.44           | 0.1545  |
| Age of Onset  | 45.8 (20.7)          | 43.2 (19.4)          | 52        | 0.48           | 0.6339  |

Continuous measures presented as mean (SD); categorical presented as % (N). Age and education presented in years, time between scans in days. MMSE and MADRS scores were scores at enrollment. Categorical variables analyzed using chi-square tests, except for DM and heart disease which used the Fisher's Exact Test. Continuous measures analyzed using pooled two-tail t-tests except for MMSE where the Satterthwaite t-test was used due to unequal variance.

Type of file: table

Label: 3

Filename: table\_3.doc

Supplemental Table 3. Demographic diagnoses by *AGTR2* genotype for women

|               | C/C<br>(N=47) | A/C<br>(N=61) | A/A<br>(N=47) | <i>df</i> | Test statistic | p value |
|---------------|---------------|---------------|---------------|-----------|----------------|---------|
| Depressed     | 53.2% (25)    | 57.4% (35)    | 48.9% (23)    | 2         | 0.76           | 0.6826  |
| Age           | 70.5 (5.9)    | 68.7 (6.2)    | 71.0 (6.7)    | 2         | 2.10           | 0.1264  |
| Education     | 14.8 (2.0)    | 14.5 (2.2)    | 14.9 (2.0)    | 2         | 0.39           | 0.6754  |
| Hypertension  | 12.8% (6)     | 32.8% (20)    | 34.0% (16)    | 2         | 7.03           | 0.0297  |
| Heart Disease | 8.5% (4)      | 11.5% (7)     | 12.8% (6)     | 2         | 0.46           | 0.7936  |
| Diabetes      | 4.3% (2)      | 3.3% (2)      | 4.3% (2)      | 2         | 0.09           | 0.9537  |
| Time Between  | 725.7 (52.4)  | 737.2 (50.7)  | 728.4 (52.1)  | 2         | 0.72           | 0.4895  |
| MRI Scans     |               |               |               |           |                |         |
| MMSE          | 28.8 (1.3)    | 28.7 (1.8)    | 28.9 (1.3)    | 2         | 0.19           | 0.8253  |
|               | N = 25        | N = 35        | N = 23        |           |                |         |
| MADRS         | 26.1 (7.9)    | 27.2 (7.5)    | 28.0 (7.5)    | 2         | 0.35           | 0.7027  |
| Age of Onset  | 42.7 (24.8)   | 40.8 (19.4)   | 46.5 (20.2)   | 2         | 0.47           | 0.6240  |

Continuous measures presented as mean (SD); categorical presented as % (N). Age and education presented in years, time between scans in days. MMSE and MADRS scores were scores at enrollment. Categorical variables analyzed using chi-square tests, except for DM and heart disease which used the Fisher's Exact Test. Continuous measures analyzed using ANCOVA.
